# Supplementary material for: Structural, magnetic, and electrochemical properties of the high pressure form of Na2Co[PO4]F
Source: Royal Society of Chemistry journal article supplement (doi:10.1039/c4dt01418a), 2014-01-01
Supplement: c4dt01418a1.pdf [file c4dt01418a1.pdf]

## Supplementary Information

**Table S1.** Anisotropic displacement parameters ( $\text{\AA}^2$ ) for HP- $\text{Na}_2\text{Co}[\text{PO}_4]\text{F}$ . The anisotropic displacement factor exponent takes the form:  $-2\pi^2[(ha^*)^2U_{11}+\dots+2hka^*b^*U_{12}]$ .

| Atom | $U_{11}$   | $U_{22}$   | $U_{33}$   | $U_{12}$   | $U_{13}$   | $U_{23}$   |
|------|------------|------------|------------|------------|------------|------------|
| Na1  | 0.0191(15) | 0.0191(15) | 0.021(3)   | 0.0096(8)  | 0          | 0          |
| Na2  | 0.0230(15) | 0.0206(15) | 0.0150(15) | 0.0125(13) | 0          | 0          |
| Na3  | 0.0169(11) | 0.0169(11) | 0.0202(20) | 0.0084(5)  | 0          | 0          |
| Co   | 0.0123(5)  | 0.0102(5)  | 0.0086(4)  | 0.0065(4)  | 0.0007(3)  | 0.0001(3)  |
| P    | 0.0079(8)  | 0.0096(8)  | 0.0082(8)  | 0.0036(7)  | 0          | 0          |
| O1   | 0.007(2)   | 0.017(2)   | 0.015(3)   | 0.0042(18) | 0          | 0          |
| O2   | 0.0139(16) | 0.0133(16) | 0.0097(16) | 0.0044(13) | 0.0005(13) | 0.0004(13) |
| O3   | 0.018(2)   | 0.018(3)   | 0.022(3)   | 0.012(2)   | 0          | 0          |
| F    | 0.0113(18) | 0.015(2)   | 0.0095(19) | 0.0045(15) | 0          | 0          |

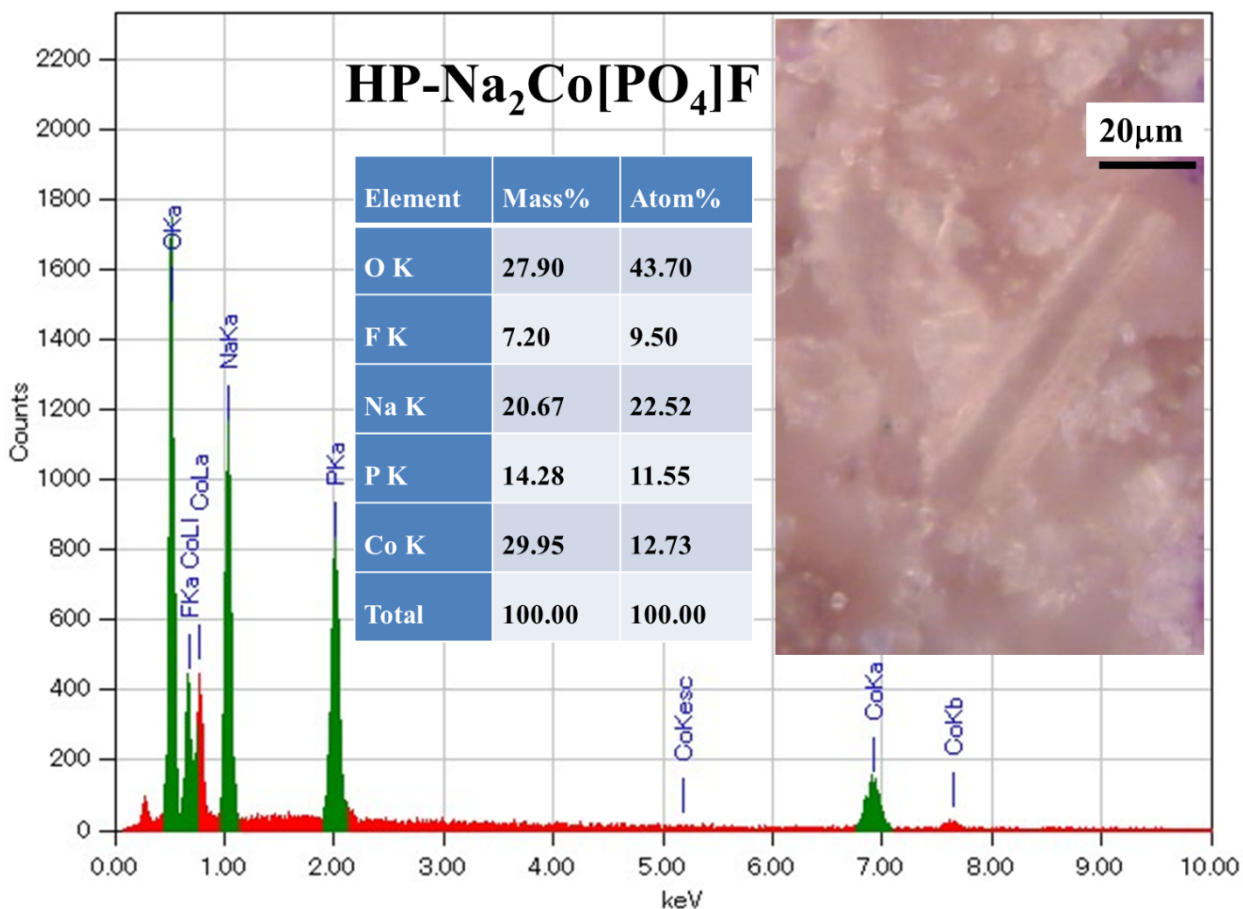

**Fig. S1.** Image and EDX analyses of the HP-Na<sub>2</sub>Co[PO<sub>4</sub>]F single crystal used for the data collection.

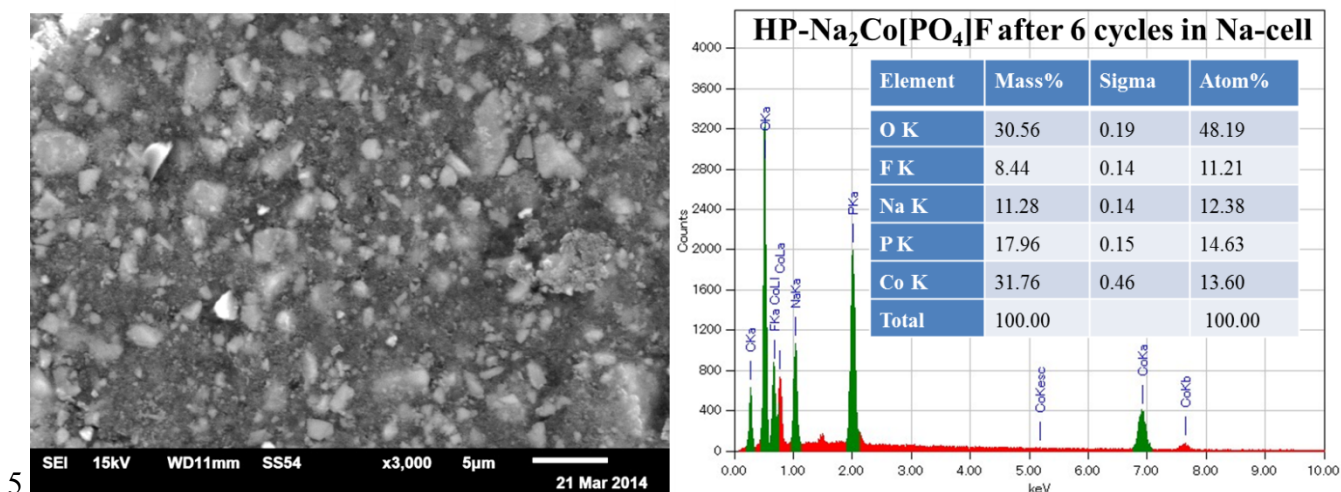

**Fig. S2.** Image and EDX analyses of the HP-Na<sub>2</sub>Co[PO<sub>4</sub>]F phase (embedded in PTFE) after six cycles in Na-cell.

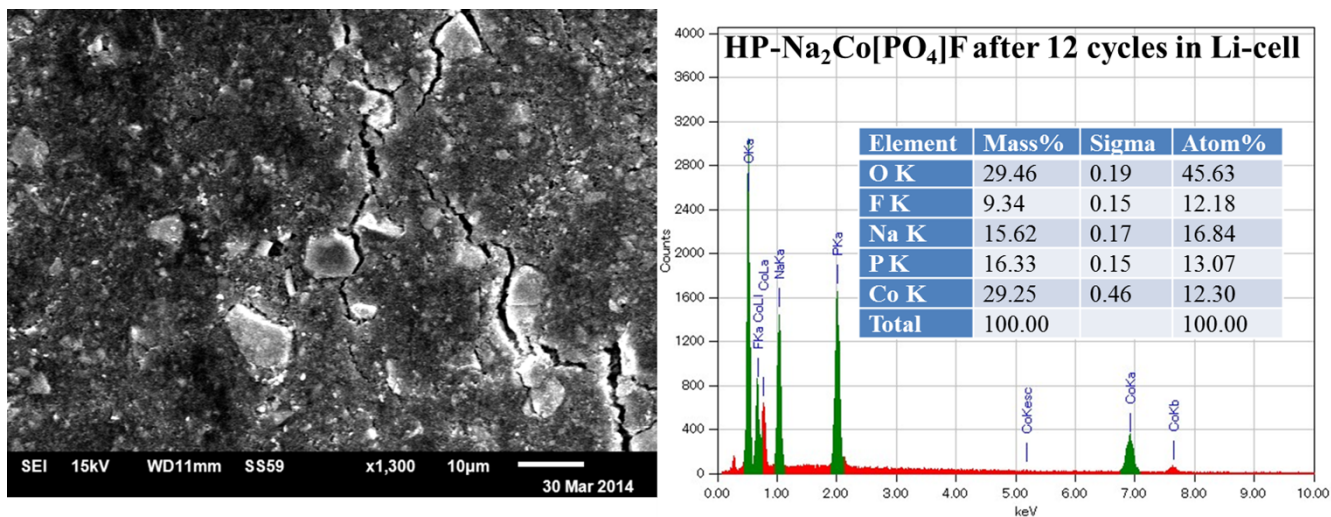

**Fig. S3.** Image and EDX analyses of the HP- $\text{Na}_2\text{Co}[\text{PO}_4]\text{F}$  phase (embedded in PTFE) after twelve cycles in Li-cell.

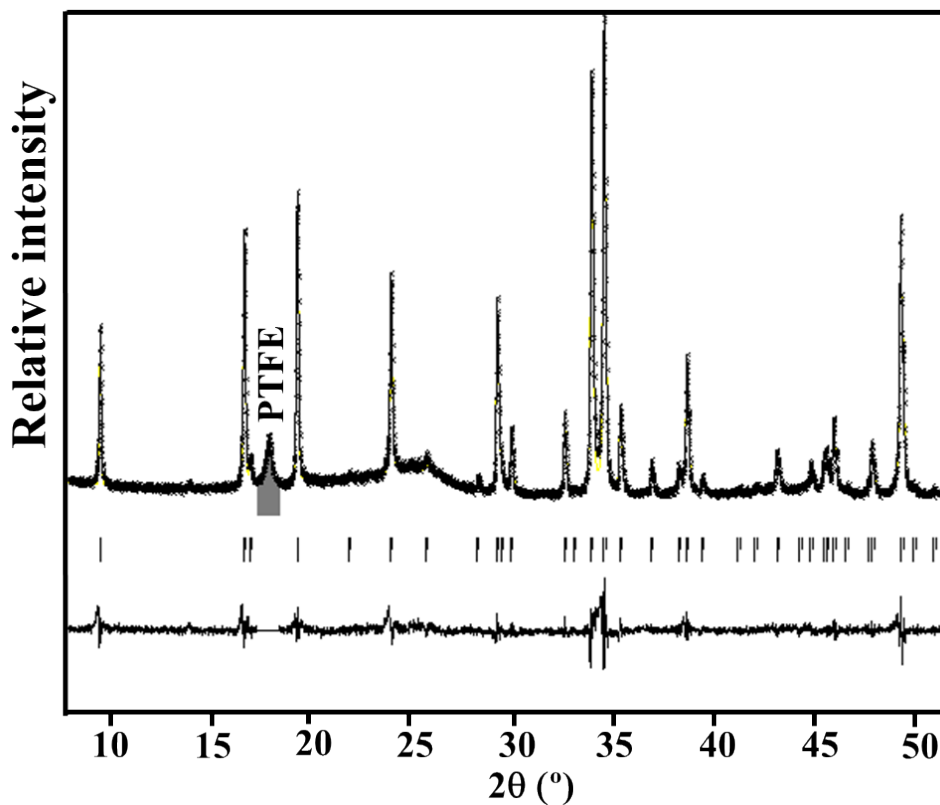

**Fig. S4.** Final observed, calculated and difference plots for powder XRD ( $\text{CuK}\alpha$ ) refinement of HP- $\text{Na}_2\text{Co}[\text{PO}_4]\text{F}$  after twelve cycles in Li-cell. The identified impurity corresponds to (PTFE).

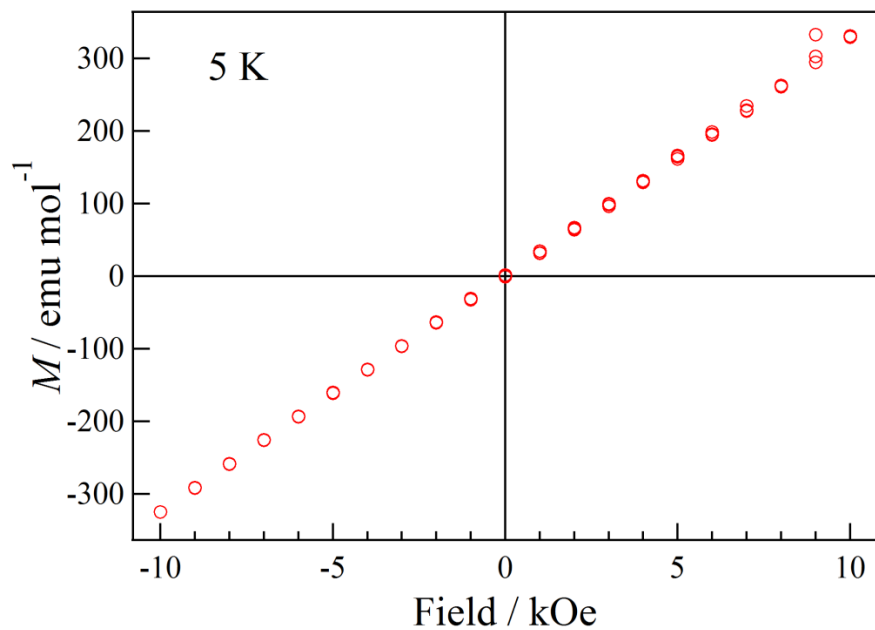

Fig. S5. Magnetization curve of HP- $\text{Na}_2\text{Co}[\text{PO}_4]\text{F}$  at 5 K.

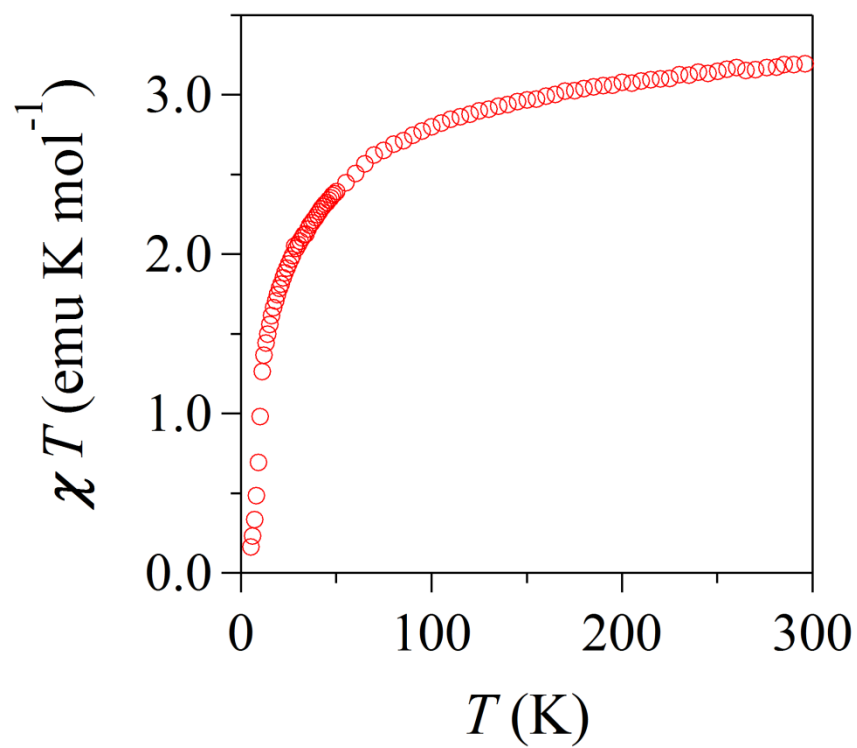

5 Fig. S6.  $\chi T$  vs  $T$  curve.
